# Supplementary material
Source: publisher figshare collection journal article supplement (https://sage.figshare.com/ndownloader/files/17417648)
Supplement: Supplementary file 1 [file 17417648]

## Appendix C

Top five evaluation criteria and complaint factors by reviewers' income status and station neighborhood type

| Low-income reviewers                |                           | Middle-income reviewers   |                             | High-income reviewers     |                                              |
|-------------------------------------|---------------------------|---------------------------|-----------------------------|---------------------------|----------------------------------------------|
| <b>Low-income area stations</b>     |                           |                           |                             |                           |                                              |
| Evaluation criteria                 | Complaints                | Evaluation criteria       | Complaints                  | Evaluation criteria       | Complaints                                   |
| Surrounding neighborhoods           | Crime-related safety      | Crime-related safety      | Crime-related safety        | Crime-related safety      | Crime-related safety                         |
| Cleanliness                         | Cleanliness               | Surrounding neighborhoods | Social environment          | Surrounding neighborhoods | Social environment                           |
| Crime-related safety                | Crowding                  | Cleanliness               | Surrounding neighborhoods   | Cleanliness               | Cleanliness                                  |
| Location                            | Surrounding neighborhoods | Social environment        | Cleanliness                 | Social environment        | Surrounding neighborhoods                    |
| Aesthetic appeal                    | Social environment        | Aesthetic appeal          | Presence of security guards | Location                  | Integration with other public transit system |
| <b>Non-low-income area stations</b> |                           |                           |                             |                           |                                              |
| Evaluation criteria                 | Complaints                | Evaluation criteria       | Complaints                  | Evaluation criteria       | Complaints                                   |
| Surrounding neighborhoods           | Social environment        | Parking                   | Crime-related safety        | Location                  | Parking                                      |
| Cleanliness                         | Crime-related safety      | Cleanliness               | Parking                     | Parking                   | Social environment                           |
| Parking                             | Parking                   | Crime-related safety      | Cleanliness                 | Surrounding neighborhoods | Crime-related safety                         |
| Location                            | Surrounding neighborhoods | Location                  | Social environment          | Cleanliness               | Cleanliness                                  |
| Crime-related safety                | Cleanliness               | Surrounding neighborhoods | Crowding                    | Social environment        | Surrounding neighborhoods                    |

## Appendix D

Top five evaluation criteria and complaint factors by reviewers' race/ethnicity and station neighborhood type

| <b>White</b>                               |                                               | <b>Asian</b>               |                      | <b>Hispanic/Black</b>      |                             |
|--------------------------------------------|-----------------------------------------------|----------------------------|----------------------|----------------------------|-----------------------------|
| <b><i>Low-income area stations</i></b>     |                                               |                            |                      |                            |                             |
| <b>Evaluation criteria</b>                 | <b>Complaints</b>                             | <b>Evaluation criteria</b> | <b>Complaints</b>    | <b>Evaluation criteria</b> | <b>Complaints</b>           |
| Cleanliness                                | Crime-related safety                          | Crime-related safety       | Crime-related safety | Crime-related safety       | Crime-related safety        |
| Crime-related safety                       | Social environment                            | Surrounding neighborhoods  | Social environment   | Surrounding neighborhoods  | Social environment          |
| Social environment                         | Cleanliness                                   | Cleanliness                | Cleanliness          | Cleanliness                | Cleanliness                 |
| Location                                   | Ease of moving around station                 | Aesthetic appeal           | Facilities           | Social environment         | Surrounding neighborhoods   |
| Surrounding neighborhoods                  | Surrounding neighborhoods                     | Social environment         | Parking              | Location                   | Presence of security guards |
| <b><i>Non-low-income area stations</i></b> |                                               |                            |                      |                            |                             |
| <b>Evaluation criteria</b>                 | <b>Complaints</b>                             | <b>Evaluation criteria</b> | <b>Complaints</b>    | <b>Evaluation criteria</b> | <b>Complaints</b>           |
| Location                                   | Parking                                       | Parking                    | Parking              | Location                   | Crime-related safety        |
| Parking                                    | Integration with other public transit systems | Location                   | Crime-related safety | Cleanliness                | Social environment          |
| Cleanliness                                | Social environment                            | Surrounding neighborhoods  | Aesthetic appeal     | Parking                    | Parking                     |
| Surrounding neighborhoods                  | Surrounding neighborhoods                     | Cleanliness                | General access       | Crime-related safety       | Cleanliness                 |
| Crime-related safety                       | Crime-related safety                          | Crime-related safety       | Social environment   | Surrounding neighborhoods  | Surrounding neighborhoods   |

## Appendix E

Top five evaluation criteria and complaint factors by reviewers' gender and station neighborhood type

| <b>Male</b>                                |                           | <b>Female</b>              |                                              |
|--------------------------------------------|---------------------------|----------------------------|----------------------------------------------|
| <b><i>Low-income area stations</i></b>     |                           |                            |                                              |
| <b>Evaluation criteria</b>                 | <b>Complaints</b>         | <b>Evaluation criteria</b> | <b>Complaints</b>                            |
| Surrounding neighborhoods                  | Crime-related safety      | Crime-related safety       | Crime-related safety                         |
| Crime-related safety                       | Cleanliness               | Social environment         | Social environment                           |
| Cleanliness                                | Surrounding neighborhoods | Cleanliness                | Cleanliness                                  |
| Location                                   | Social environment        | Surrounding neighborhoods  | Surrounding neighborhoods                    |
| Social environment                         | Location                  | Location                   | Integration with other public transit system |
| <b><i>Non-low-income area stations</i></b> |                           |                            |                                              |
| <b>Evaluation criteria</b>                 | <b>Complaints</b>         | <b>Evaluation criteria</b> | <b>Complaints</b>                            |
| Parking                                    | Parking                   | Cleanliness                | Crime-related safety                         |
| Location                                   | Crime-related safety      | Parking                    | Social environment                           |
| Cleanliness                                | Social environment        | Location                   | Parking                                      |
| Surrounding neighborhoods                  | Cleanliness               | Surrounding neighborhoods  | Cleanliness                                  |
| Crime-related safety                       | Noise                     | Crime-related safety       | Surrounding neighborhoods                    |

## Appendix F

### Station audit instrument and average ratings for each attribute by neighborhood type

| Factors                                  |                           | Description                                                                                                | Response categories                                                                                                                           | Average rating          |                             |
|------------------------------------------|---------------------------|------------------------------------------------------------------------------------------------------------|-----------------------------------------------------------------------------------------------------------------------------------------------|-------------------------|-----------------------------|
|                                          |                           |                                                                                                            |                                                                                                                                               | Low-income <sup>1</sup> | Non-low-income <sup>2</sup> |
| <b>Comfort</b>                           | Noise level               | This station was --- at the time of my observation.                                                        | (1) very noisy (2) noisy (3) neither noisy or quiet (4) quiet (5) very quiet                                                                  | 2.70                    | 3.56                        |
|                                          | Source of noise           | What was the source of noise?                                                                              | Narratives                                                                                                                                    | N/A                     | N/A                         |
|                                          | Crowdedness               | This station was --- at the time of my observation.                                                        | (1) very crowded (2) crowded (3) neither crowded nor uncongested (4) uncongested (5) empty                                                    | 4.00                    | 3.50                        |
|                                          | Number of passengers      | There were --- passengers at the time of my observation.                                                   | (1) 0 (2) 1-5 (3) 6-10 (4) 11-20 (5) > 20                                                                                                     | 3.50                    | 4.00                        |
| <b>Facilities</b>                        | Number of benches         | This station has --- bench(es) at the station platform.                                                    | (1) 0 (2) 1-2 (3) 3-5 (4) 6-10 (5) > 10                                                                                                       | 3.50                    | 3.50                        |
|                                          | Number of available seats | There were --- seats available in the benches.                                                             | (1) no (2) few (3) some (4) many                                                                                                              | 3.50                    | 3.33                        |
|                                          | Shelters (Rain)           | Passengers can avoid rain at the station platform.                                                         | (1) no (2) yes                                                                                                                                | 1.00                    | 1.00                        |
|                                          | Shelters (wind)           | Passengers can avoid wind at the station platform.                                                         | (1) no (2) yes                                                                                                                                | 1.30                    | 1.44                        |
| <b>Cleanliness /Aesthetic appeal</b>     | Cleanliness               | This station (including platforms, entrance, and stair) was ---.                                           | (1) very dirty (2) dirty (3) neither dirty nor clean (4) clean (5) very clean                                                                 | 2.90                    | 3.61                        |
|                                          | Amount of trash           | There was --- trash in this station (including platforms, entrance, and stairs).                           | (1) much: trashes was very noticeable<br>(2) some: trash was noticeable<br>(3) little: trash was present<br>(4) no: there was no trash at all | 2.90                    | 3.11                        |
|                                          | Smell                     | This station (including platforms, entrance, and stair) was ---.                                           | (1) very smelly (2) smelly (3) neither smelly nor fragrant (4) fragrant                                                                       | 2.20                    | 2.72                        |
|                                          |                           | What was the source of that smell?                                                                         | Narratives                                                                                                                                    | N/A                     | N/A                         |
|                                          | Artwork/decorations       | This station has --- art piece or decorations (e.g., sculptures).                                          | (1) no (2) few (3) some (4) many                                                                                                              | 2.20                    | 2.50                        |
|                                          | Views                     | This station has --- view or scenery.                                                                      | (1) bad (2) neither bad nor great (3) great                                                                                                   | 1.70                    | 2.00                        |
| <b>Security &amp; social environment</b> | Light                     | This station is ---.                                                                                       | (1) dark (2) neither well-lit nor dark (3) well-lit                                                                                           | 2.70                    | 2.94                        |
|                                          | Police/security guards    | There were --- police or security guards at this station (including platforms, parking lot, and entrance). | (1) no (2) 1 (3) 2-3 (4) 4-6 (5) > 6 (or police station at a rail station)                                                                    | 1.90                    | 2.22                        |
|                                          | Homeless people           | There were --- homeless people at this station (including platforms, parking lot, and entrance).           | (1) > 6 (2) 4-6 (3) 2-3 (4) 1 (5) no                                                                                                          | 3.60                    | 4.56                        |
|                                          | Shady people              | There were ---shady people at this station (including platforms, parking lot, and entrance).               | (1) > 6 (2) 4-6 (3) 2-3 (4) 1 (5) no                                                                                                          | 3.20                    | 4.17                        |

**Appendix F** continued

| Factors                                  |                                  | Description                                                              | Response categories                                                                                                                                                                                     | Low-income <sup>1</sup> | Non-low-income <sup>2</sup> |
|------------------------------------------|----------------------------------|--------------------------------------------------------------------------|---------------------------------------------------------------------------------------------------------------------------------------------------------------------------------------------------------|-------------------------|-----------------------------|
| <b>Security &amp; social environment</b> | Overall safety                   | Overall, I felt --- at this station.                                     | (1) very unsafe (2) unsafe (3) neither unsafe nor safe (4) safe (5) very safe                                                                                                                           | 2.40                    | 4.06                        |
|                                          | Safety reasons                   | Why did you feel safe/unsafe?                                            | Narratives                                                                                                                                                                                              | N/A                     | N/A                         |
|                                          | Overall user characteristics     | Describe the sociodemographic characteristics of the riders              | Narratives                                                                                                                                                                                              | N/A                     | N/A                         |
| <b>Parking</b>                           | Parking lot                      | The station has a --- parking lot.                                       | (1) no (2) yes                                                                                                                                                                                          | 1.40                    | 1.67                        |
|                                          | Availability of parking space    | There were --- parking spaces in the parking structure.                  | (1) no (no parking lot) (2) no (parking lot is full) (3) few (4) some (5) ample                                                                                                                         | 2.30                    | 2.78                        |
| <b>Access</b>                            | Entry/Exit (inside the station)  | It is --- to find an entry/exit inside the station.                      | (1) difficult (2) neither difficult nor easy (3) easy                                                                                                                                                   | 3.00                    | 3.00                        |
|                                          | Access (from the street)         | It is --- to access and find out the station from the street.            | (1) difficult (2) neither difficult nor easy (3) easy                                                                                                                                                   | 2.70                    | 2.50                        |
|                                          | Ease of moving in/around station | It is --- to move around the station (e.g., way-finding)                 | (1) difficult (2) neither difficult nor easy (3) easy                                                                                                                                                   | 2.80                    | 3.00                        |
| <b>Location</b>                          | Location                         | This station has a --- location.                                         | (1) very poor (2) poor (3) neither poor nor great (4) great (5) very great                                                                                                                              | 2.90                    | 3.39                        |
|                                          | Reasons                          | Why do you think this station has a great or poor location?              | Narratives                                                                                                                                                                                              | N/A                     | N/A                         |
|                                          | Surrounding neighborhood         | There are --- to eat/drink or things to do right near the station.       | (1) nothing (2) few things (3) some things (4) many things                                                                                                                                              | 2.70                    | 2.94                        |
| <b>Transit networks</b>                  | Train frequency                  | Train came --- at the time of my observation.                            | (1) very infrequently (> 15 minutes)<br>(2) infrequently (10–15 minutes)<br>(3) neither frequently nor infrequently (5–10 minutes)<br>(4) frequently (3–5 minutes)<br>(5) very frequently (≤ 3 minutes) | 2.20                    | 3.00                        |
|                                          | Distance to the closest bus stop | The closest bus stop is --- by walking.                                  | (1) very far (> 15 minutes)<br>(2) far (10–15 minutes)<br>(3) neither far nor close (5–10 minutes)<br>(4) close (3–5 minutes)<br>(5) very close (≤ 3 minutes)                                           | 4.80                    | 4.89                        |
|                                          | Number of bus lines              | There are --- bus line(s) connected to this stations.                    | (1) < 2 (2) 2-4 (3) 5-9 (4) > 9                                                                                                                                                                         | 1.90                    | 2.78                        |
| <b>Overall rating</b>                    | Overall ratings                  | If you were to rate this station overall, how many stars would you give? | (1) 1 star (2) 2 stars (3) 3 stars (4) 4 stars (5) 5 stars                                                                                                                                              | 2.70                    | 3.50                        |

Notes:<sup>1</sup> Mariachi Plaza (gold), San Pedro (blue), Slauson (blue), Vermont/Athens (green), Westlake/MacArthur Park (red/purple) <sup>2</sup> Harbor Freeway (green), Wilshire/Western (purple), Hollywood/Western (red), Universal City (red), Florence (blue), Pico (blue), Del Mar (gold), Lincoln Heights/Cypress Park (gold), Indiana (gold)
